# Supplementary material for: Liquid reagents are not enough for liquid assisted grinding in the synthesis of [(AgBr)(n-pica)]n
Source: Royal Society of Chemistry journal article supplement (doi:10.1039/d3cp04791a), 2024-01-01
Supplement: d3cp04791a1.pdf [file d3cp04791a1.pdf]

Electronic Supplementary Material (ESI) for Physical Chemistry Chemical Physics. This journal is © the Owner Societies 2023

# Liquid reagents are not enough for liquid assisted grinding in the synthesis of $[(\text{AgBr})(n\text{-pica})]_n$

Caterina Zuffa, Chiara Cappuccino, Lucia Casali, Franziska Emmerling, Lucia Maini

*Dipartimento di Chimica "G. Ciamician", Università di Bologna, Via F. Selmi 2, Bologna, Italy and  
BAM Federal Institute for Material Research and Testing, Richard Willstätter-Strasse 11, 12489  
Berlin, Germany*

## Supporting information

|                                                                  |   |
|------------------------------------------------------------------|---|
| S1. Crystallographic data.....                                   | 2 |
| S2. Rietveld refinement .....                                    | 2 |
| S3. DSC analysis .....                                           | 3 |
| S4. TGA analysis .....                                           | 4 |
| S5. Mechanochemical synthesis and conversion of the phases ..... | 5 |
| References .....                                                 | 9 |

## S1. Crystallographic data

**Table S1.** Crystallographic information of  $[(\text{AgBr})_2(\text{n-pica})]_n$ .

|                                                | $[(\text{AgBr})_2(\text{3pica})]_n$                    | $[(\text{AgBr})_2(\text{4pica})]_n$                    |
|------------------------------------------------|--------------------------------------------------------|--------------------------------------------------------|
| Empirical formula                              | $\text{C}_6\text{H}_8\text{Ag}_2\text{Br}_2\text{N}_2$ | $\text{C}_6\text{H}_8\text{Ag}_2\text{Br}_2\text{N}_2$ |
| Formula weight (g mol <sup>-1</sup> )          | 483.68                                                 | 483.68                                                 |
| T (K)                                          | 293                                                    | 293                                                    |
| Wavelength (Å)                                 | 0.71073                                                | 1.535                                                  |
| Crystal system                                 | Monoclinic                                             | Orthorhombic                                           |
| Space group                                    | C2/c                                                   | Pbca                                                   |
| <i>a</i> (Å)                                   | 24.605(3)                                              | 14.282(1)                                              |
| <i>b</i> (Å)                                   | 6.2851(5)                                              | 22.011(1)                                              |
| <i>c</i> (Å)                                   | 14.3050(12)                                            | 6.624(1)                                               |
| β (°)                                          | 110.938(9)                                             | 90                                                     |
| <i>V</i> (Å <sup>3</sup> )                     | 2066.2(3)                                              | 2082                                                   |
| <i>Z</i> , <i>Z'</i>                           | 8, 1                                                   | 8, 1                                                   |
| ρ <sub>calc</sub> (mg m <sup>-3</sup> )        | 3.110                                                  | 3.088                                                  |
| μ (mm <sup>-1</sup> )                          | 11.474                                                 |                                                        |
| <i>F</i> (000)                                 | 1776                                                   |                                                        |
| crystal size (mm)                              | 0.167×0.143×0.076                                      | powder                                                 |
| θ range for data collection (°)                | 3.360° to 28.984°                                      | 6° to 75°                                              |
| reflections collected                          | 4378                                                   |                                                        |
| Independent reflections                        | 2359                                                   |                                                        |
| R <sub>int</sub> /R-Bragg                      | 0.0698                                                 | 0.0337                                                 |
| Completeness to theta = 25.000°                | 99.8%                                                  |                                                        |
| Refinement method                              | Full-matrix least-squares on <i>F</i> <sup>2</sup>     | Rietveld                                               |
| T <sub>max</sub> /T <sub>min</sub>             | 1.00000/0.16766                                        |                                                        |
| data/restraints/parameters                     | 2359 / 0 / 110                                         |                                                        |
| Goodness-of-fit                                | 0.991                                                  | 1.08                                                   |
| R1 [ <i>I</i> > 2σ( <i>I</i> )]/R <sub>p</sub> | 0.0726                                                 | 0.0448                                                 |
| wR2 (all data)/R <sub>w</sub> p                | 0.1277                                                 | 0.0607                                                 |

**Table S2.** Crystallographic information of  $[(\text{AgBr})(\text{n-pica})]_n$ , already published here.<sup>1</sup>

|                                         | $[(\text{AgBr})(\text{3-pica})]_n$   | $[(\text{AgBr})(\text{4-pica})]_n$   |
|-----------------------------------------|--------------------------------------|--------------------------------------|
| Empirical formula                       | $\text{C}_6\text{H}_8\text{AgBrN}_2$ | $\text{C}_6\text{H}_8\text{AgBrN}_2$ |
| Formula weight (g mol <sup>-1</sup> )   | 295.915                              | 295.915                              |
| T (K)                                   | 293                                  | 293                                  |
| Wavelength (Å)                          | 0.71073                              | 1.535                                |
| Crystal system                          | monoclinic                           | monoclinic                           |
| Space group                             | P2 <sub>1</sub> /c                   | P2 <sub>1</sub> /c                   |
| <i>a</i> (Å)                            | 9.4518(6)                            | 6.316                                |
| <i>b</i> (Å)                            | 6.1880(3)                            | 7.365                                |
| <i>c</i> (Å)                            | 14.3981(9)                           | 17.769                               |
| <i>a</i> (Å)                            | 90                                   | 90                                   |
| <i>b</i> (Å)                            | 105.712(6)                           | 81.08                                |
| <i>g</i> (Å)                            | 90                                   | 90                                   |
| <i>V</i> (Å <sup>3</sup> )              | 810.64(8)                            | 816                                  |
| <i>Z</i> , <i>Z'</i>                    | 4, 1                                 | 4, 1                                 |
| ρ <sub>calc</sub> (mg m <sup>-3</sup> ) | 2.425                                | 2.407                                |

## S2. Rietveld refinement

A polycrystalline sample of  $[(\text{AgBr})_2(\text{4-pica})]_n$  was loaded into a 0.5 mm borosilicate glass capillary and transmission powder X-ray diffraction (PXRD) data were collected over the range 5°–75° 2θ (2 kW; Cu Kα1, 1.54056 Å; step size 0.017° 2θ), for a total of 6 hours. The Panalytical X'Pert PRO diffractometer was equipped with a Pixel detector. The data indexed to an orthorhombic cell were Pawley fitted in TOPAS6<sup>2</sup> and then the most probable space group of Pbca determined by use of the same program. A Chebyshev function and a pseudo-Voigt (TCHZ type) were used to fit the background and the peak shape, respectively. Consideration of the cell volume, molecular volume, and space group symmetry suggested *Z'* = 1. The validity of the structure was confirmed by a Rietveld refinement against data in the range 6°–70° 2θ using TOPAS6. The final Rietveld refinement yield an R<sub>w</sub>p value of 6.1.

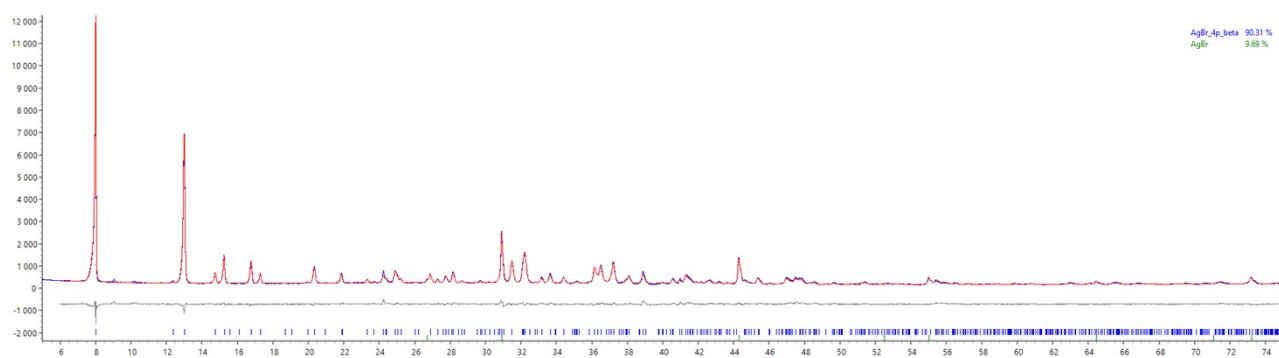

**Figure S1.** Rietveld refinement (red line) of  $[(\text{AgBr})_2(4\text{-pica})]_n$  diffraction pattern (blue line). Peaks of unreacted AgBr are present. In grey, the difference plot.

### S3. DSC analysis

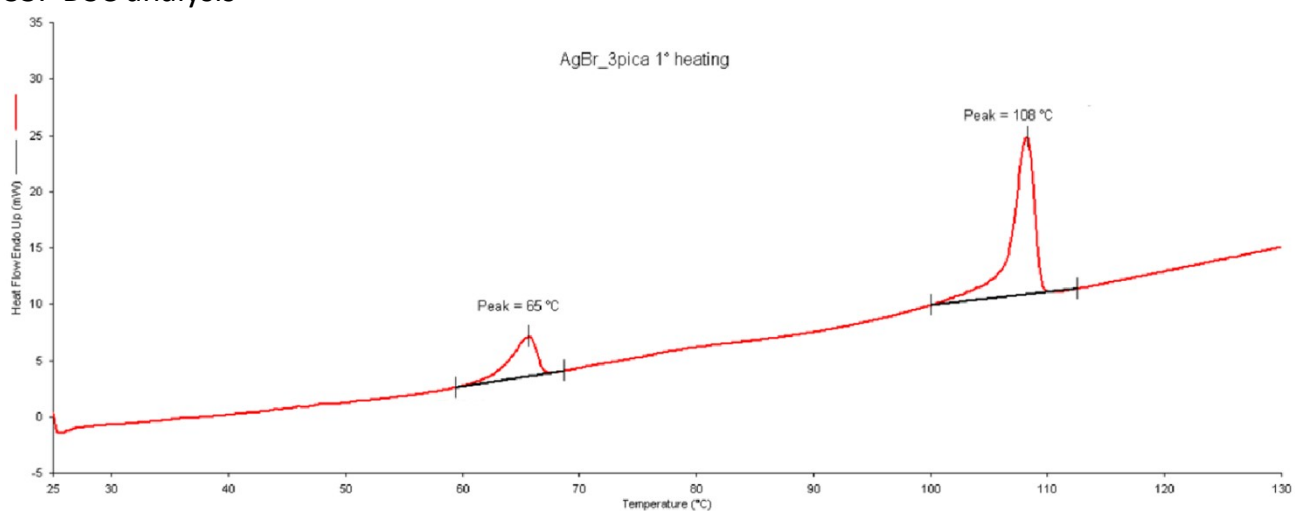

**Figure S2.** DSC curve of  $[(\text{AgBr})_3(3\text{-pica})]_n$ . The endothermic peak observed at 65°C was identified as resulting from the partial loss of 3-pica and its conversion into  $[(\text{AgBr})_2(3\text{-pica})]_n$ , while the peak at 108°C was attributed to the melting of the compound.

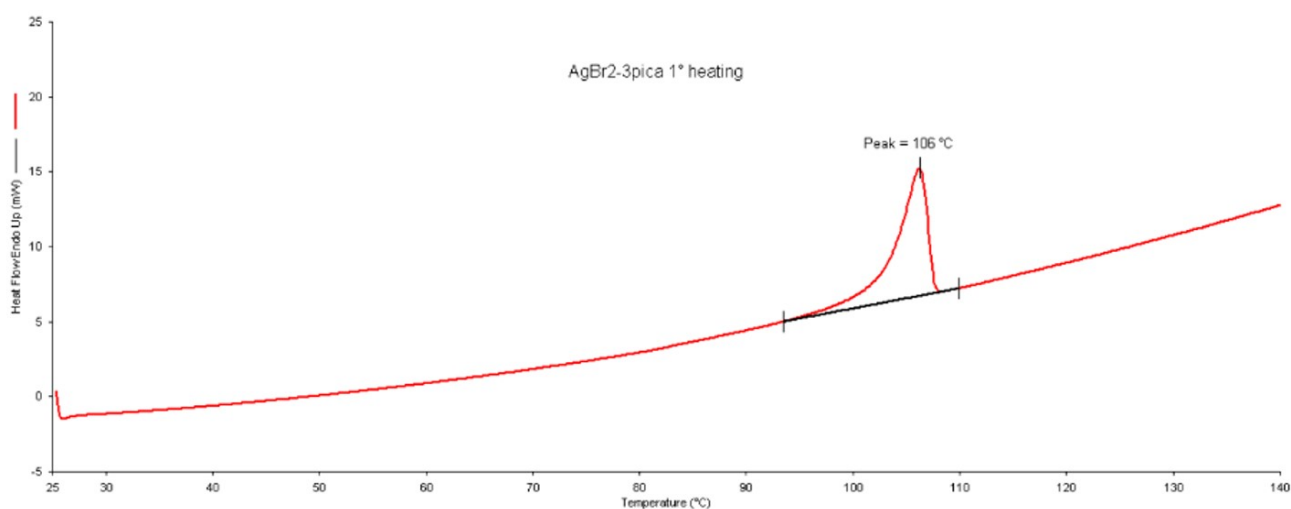

**Figure S3.** DSC curve of  $[(\text{AgBr})_2(3\text{-pica})]_n$  with melting at 106°C.

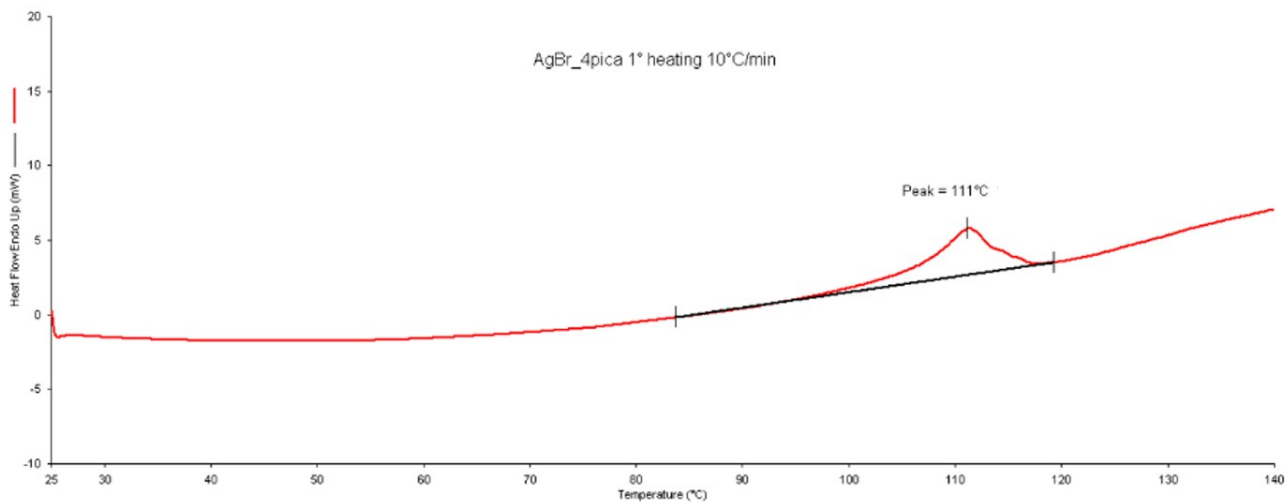

**Figure S4.** DSC curve of  $[(\text{AgBr})(4\text{-pica})]_n$ . It exhibits only an endothermic peak at 111°C which is attributed to the melting of the compound and hence the thermal conversion of the 1:1 phase into the 2:1 is not observed.

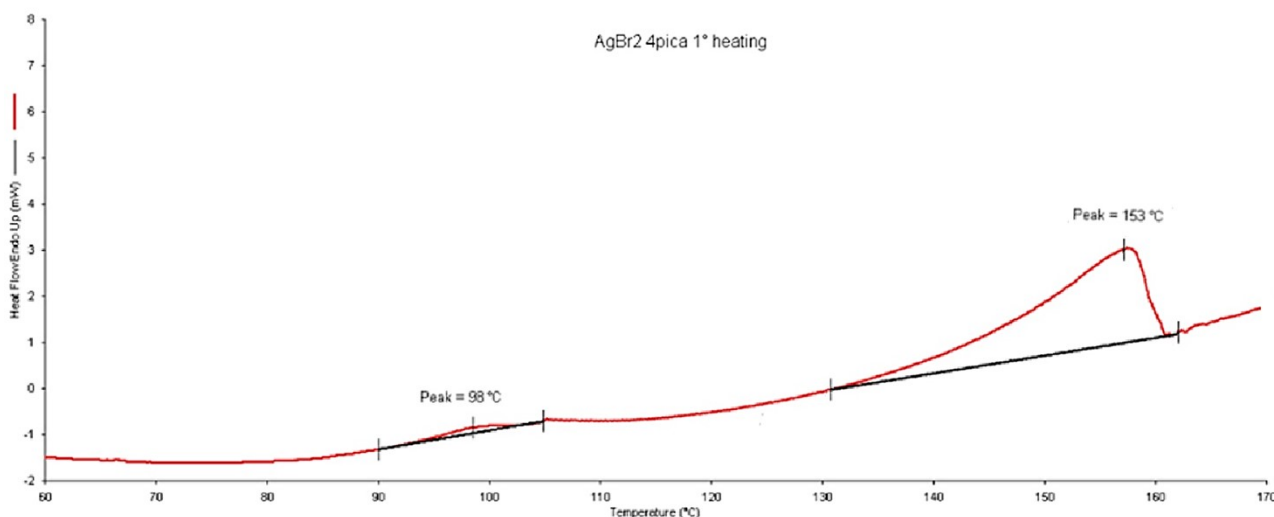

**Figure S5.** DSC curve of  $[(\text{AgBr})_2(4\text{-pica})]_n$ , the endothermic peak at 98°C was attributed to partial loss of 4-pica before the melting at 153°C.

#### S4. TGA analysis

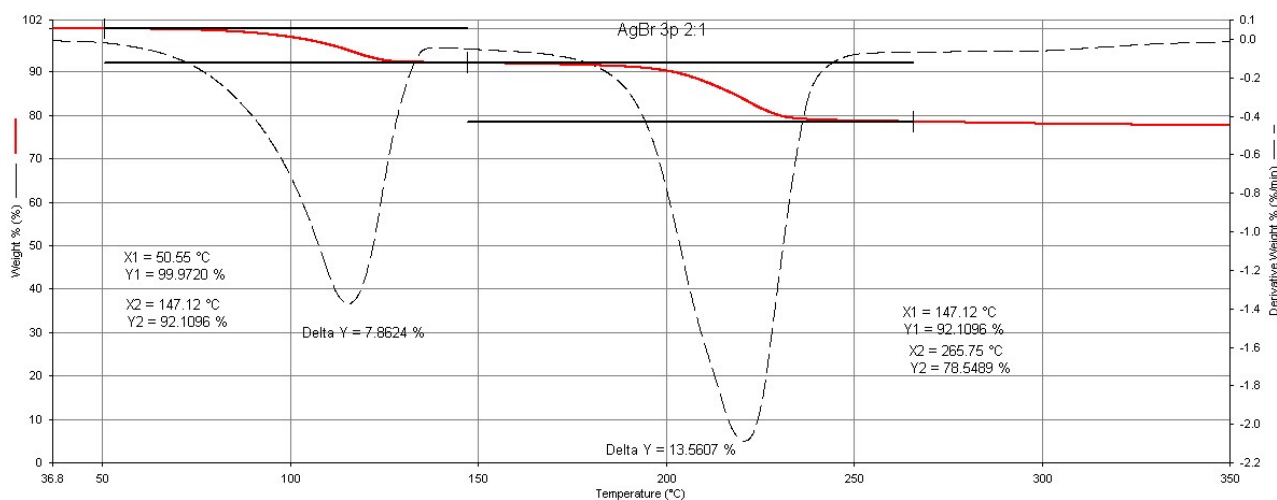

**Figure S6.** TGA analysis of  $[(\text{AgBr})_2(3\text{-pica})]_n$

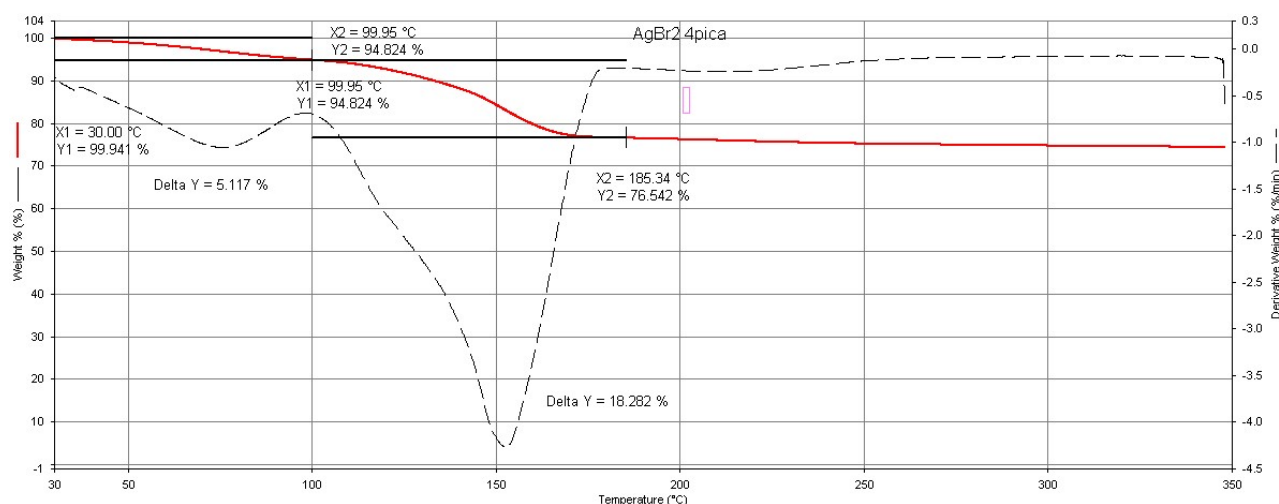

**Figure S7.** TGA analysis of  $[(\text{AgBr})_2(4\text{-pica})]_n$ .

## S5. Mechanochemical synthesis and conversion of the phases

The powders obtained by grinding for 60 minutes 1.0 mmol of AgBr with different amounts of 3-pica were analyzed and the different phase quantified by Rietveld refinement. 1:1 and 2:1 phases correspond to  $[(\text{AgBr})(3\text{-pica})]_n$  and  $[(\text{AgBr})_2(3\text{-pica})]_n$  respectively. The synthesis with 0.07 and 0.08 mL of 3-pica were repeated 3 times, and the average values were reported in the graph.

**Table S3.** Summary table of Fig 6. The mass percentages of the composition were determined by conducting Rietveld refinement on the powder diffraction data obtained using the X'Pert HighscorePlus program.<sup>3</sup> The reactions in stoichiometric ratio are highlighted in bold.

| AgBr (mmol) | 3-pica (mL) | 3-pica (mmol) | 1:1 %     | 2:1 %     | Unreacted AgBr % |
|-------------|-------------|---------------|-----------|-----------|------------------|
| 1.0         | 0.01        | 0.1           | 0         | 20        | 80               |
| 1.0         | 0.02        | 0.2           | 0         | 42        | 58               |
| 1.0         | 0.03        | 0.3           | 0         | 61        | 39               |
| 1.0         | 0.04        | 0.4           | 0         | 93        | 8                |
| <b>1.0</b>  | <b>0.05</b> | <b>0.5</b>    | <b>0</b>  | <b>94</b> | <b>6</b>         |
| 1.0         | 0.06        | 0.6           | 0         | 97        | 3                |
| 1.0         | 0.07        | 0.7           | 37        | 60        | 4                |
| 1.0         | 0.08        | 0.8           | 63        | 36        | 2                |
| 1.0         | 0.09        | 0.9           | 73        | 24        | 4                |
| <b>1.0</b>  | <b>0.10</b> | <b>1.0</b>    | <b>94</b> | <b>5</b>  | <b>2</b>         |
| 1.0         | 0.15        | 1.5           | 99        | 0         | 1                |
| 1.0         | 0.20        | 2.0           | 99        | 0         | 1                |
| 1.0         | 0.30        | 3.0           | 100       | 0         | 0                |

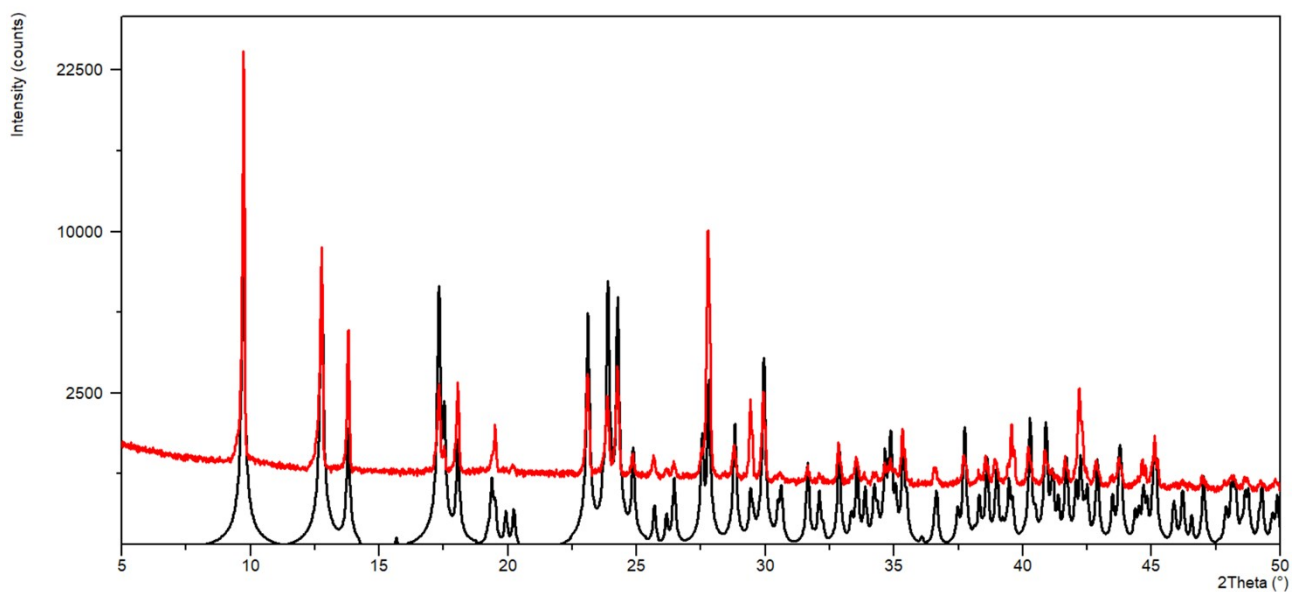

**Figure S8.** Comparison between calculated (black line) and experimental (red line) X-ray powder diffraction patterns of  $[(\text{AgBr})(3\text{-pica})]_n$ , obtained by grinding 1 mmol of AgBr, 2 mmol of 3-pica and 0.02 mL of acetonitrile. No unreacted AgBr is present in the powder.

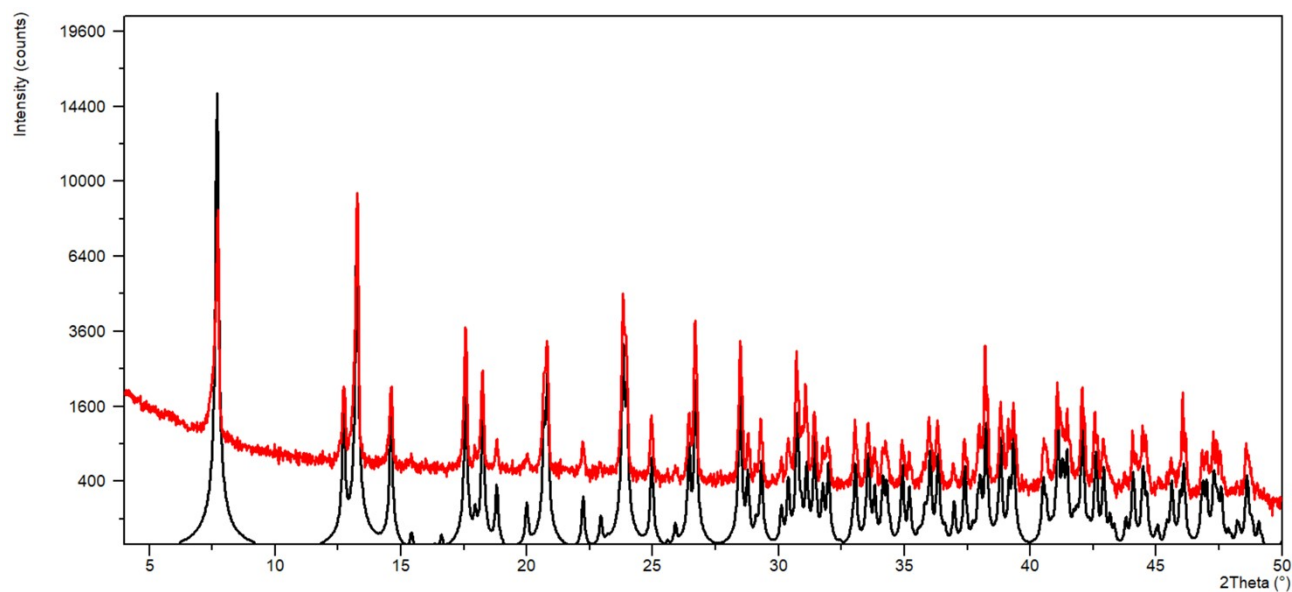

**Figure S9.** Comparison between calculated (black line) and experimental (red line) X-ray powder diffraction patterns of  $[(\text{AgBr})_2(3\text{-pica})]_n$ , obtained by grinding 1 mmol of AgBr, 0.6 mmol of 3-pica and 0.02 mL of acetonitrile. No unreacted AgBr is present in the powder.

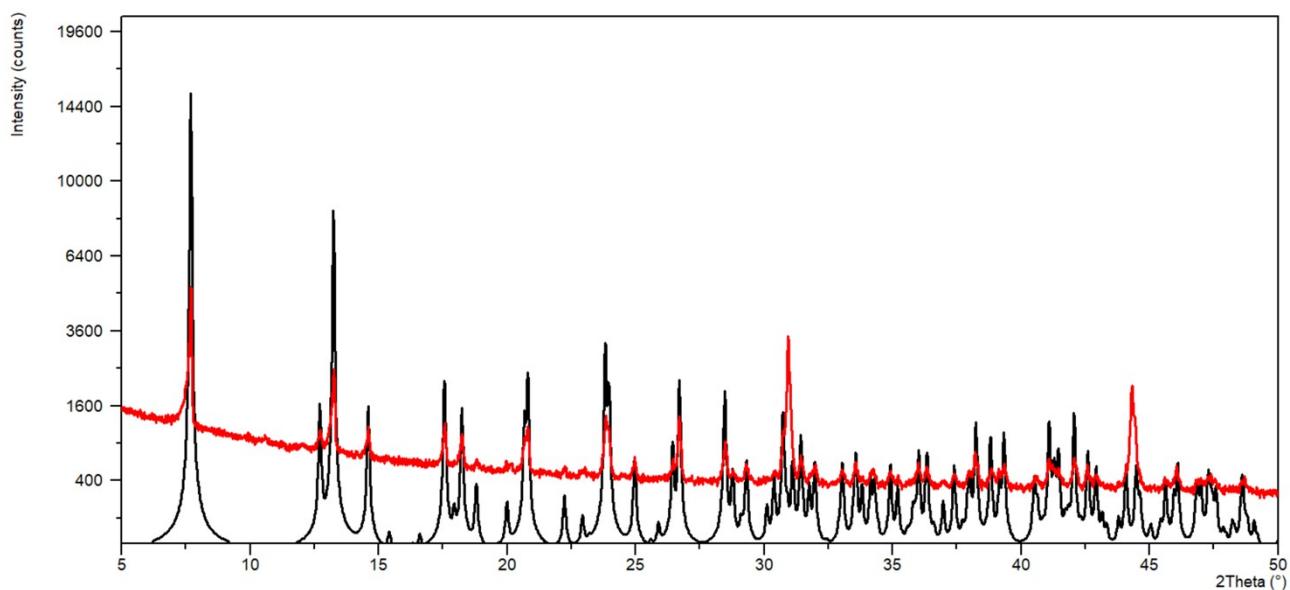

**Figure S10.** Comparison between experimental (red line) and calculated (black) pattern of  $[(\text{AgBr})_2(3\text{-pica})]_n$  X-ray powder diffraction patterns. The powder was obtained by grinding  $[(\text{AgBr})(3\text{-pica})]_n$  with AgBr. The peaks at  $2\theta = 30.97^\circ$  and  $44.33^\circ$  belong to AgBr.

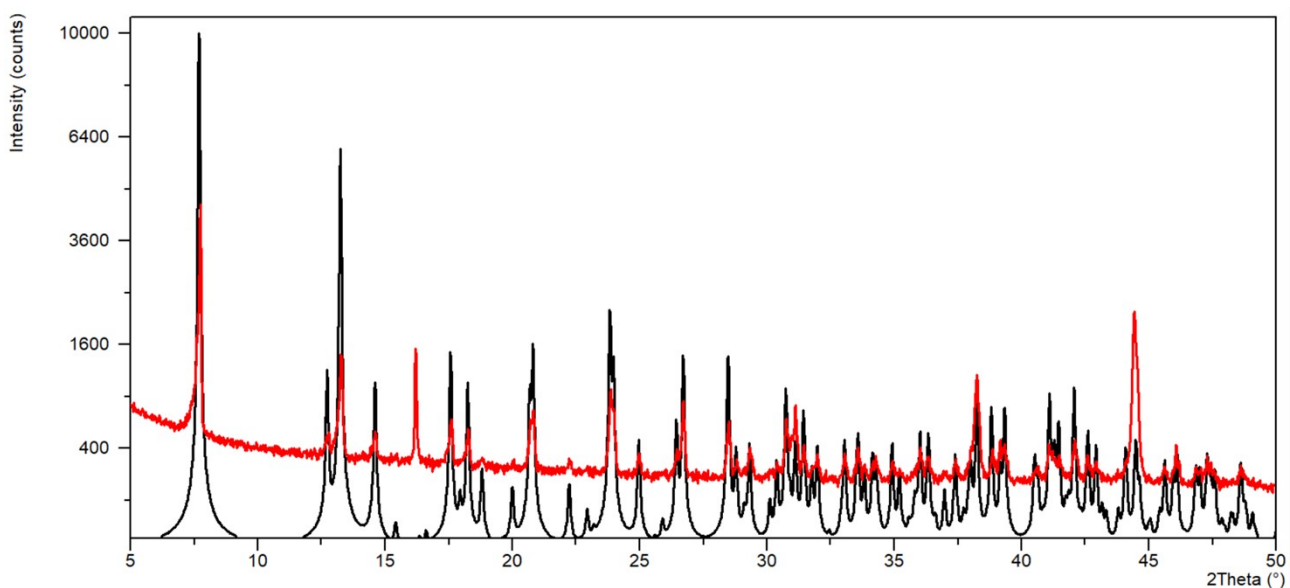

**Figure S11.** Comparison between experimental (red line) and calculated (black) pattern of  $[(\text{AgBr})_2(3\text{-pica})]_n$  X-ray powder diffraction patterns. The powder was obtained by heating  $[(\text{AgBr})(3\text{-pica})]_n$  at  $65^\circ\text{C}$  for one hour. The peaks at  $2\theta = 30.97^\circ$  and  $44.33^\circ$  belong to AgBr, the peak at  $2\theta = 16.25^\circ$  belongs to the sample holder.

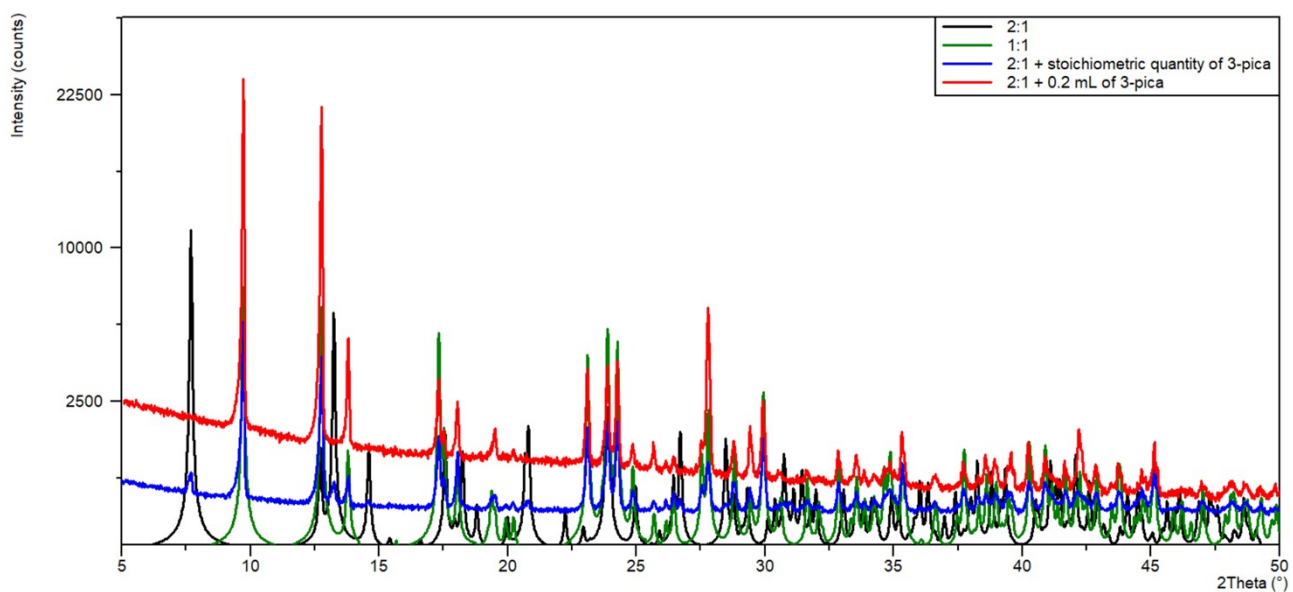

**Figure S12.** Comparison between X-ray powder diffraction patterns of  $[(\text{AgBr})_2(3\text{-pica})]_n$ , after the grinding reaction with a stoichiometric quantity of 3-pica (blue line) to obtain  $[(\text{AgBr})(3\text{-pica})]_n$ , the pattern correspond to a mixture of the two phases by adding a large excess of 3-pica the full conversion was obtained (red line). The calculated pattern of the  $[(\text{AgBr})(3\text{-pica})]_n$  phase is in green, the one of  $[(\text{AgBr})_2(3\text{-pica})]_n$  is in black.

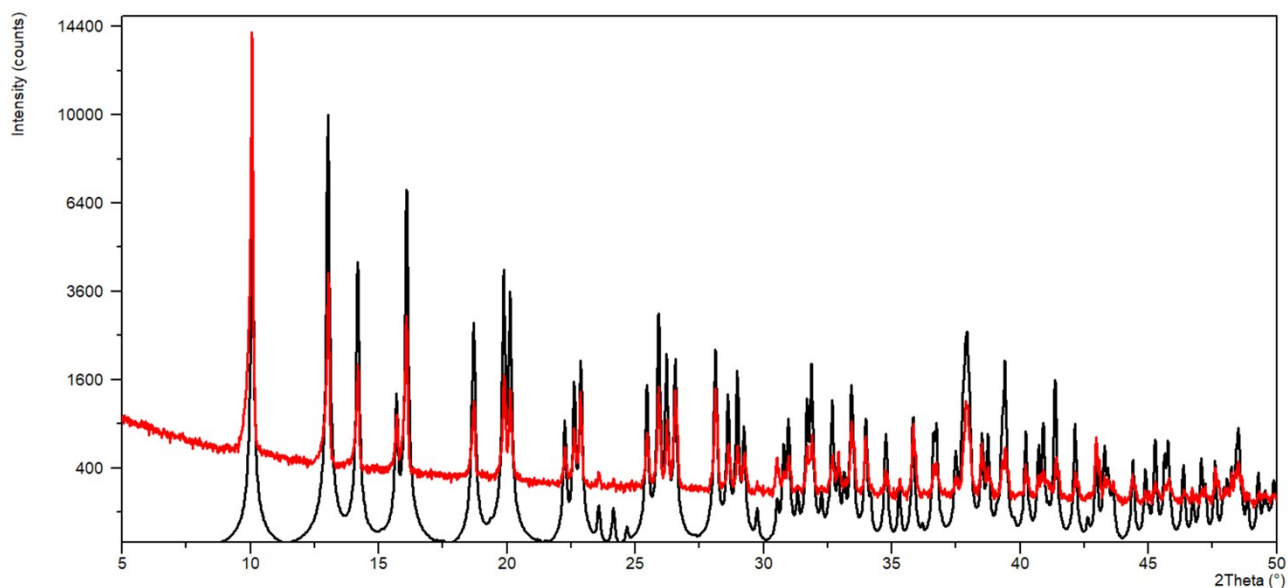

**Figure S13.** Comparison between calculated (black line) and experimental (red line) X-ray powder diffraction patterns of  $[(\text{AgBr})(4\text{-pica})]_n$ , the 1:1 phase, obtained by grinding 1 mmol of AgBr and 2 mmol of 4-pica. No unreacted AgBr is present in the powder.



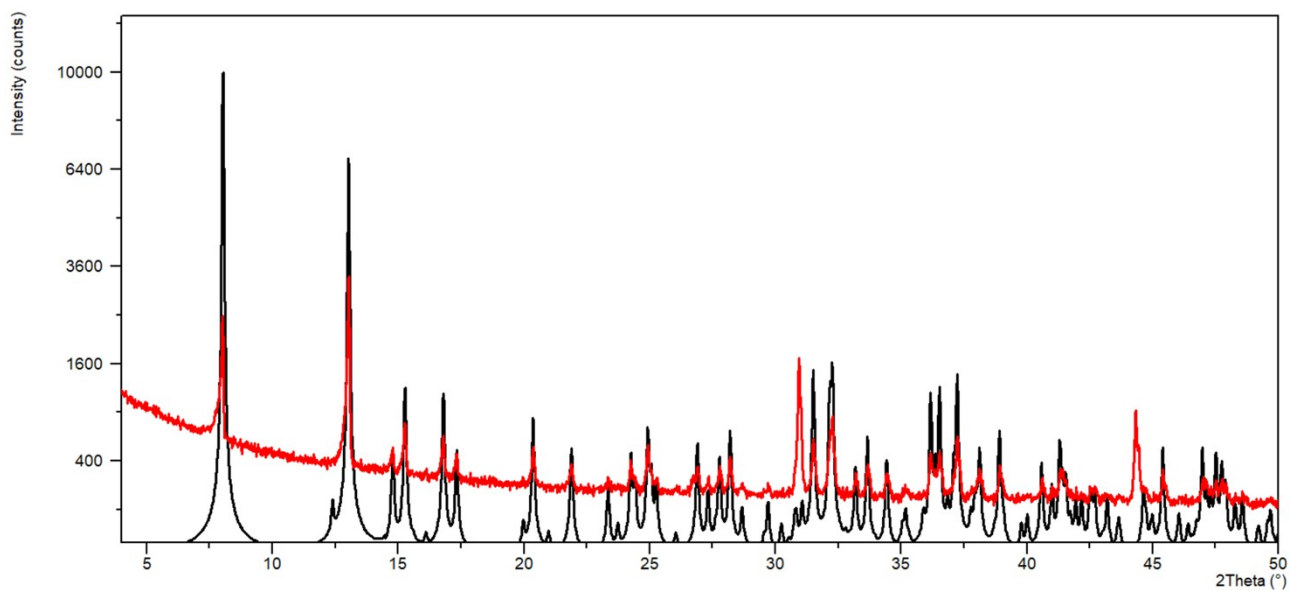

**Figure S14.** Comparison between calculated (black line) and experimental (red line) X-ray powder diffraction patterns of  $[(\text{AgBr})_2(4\text{-pica})]_n$ , the 2:1 phase. The peaks at  $2\theta = 30.97^\circ$  and  $44.33^\circ$  belong to AgBr.

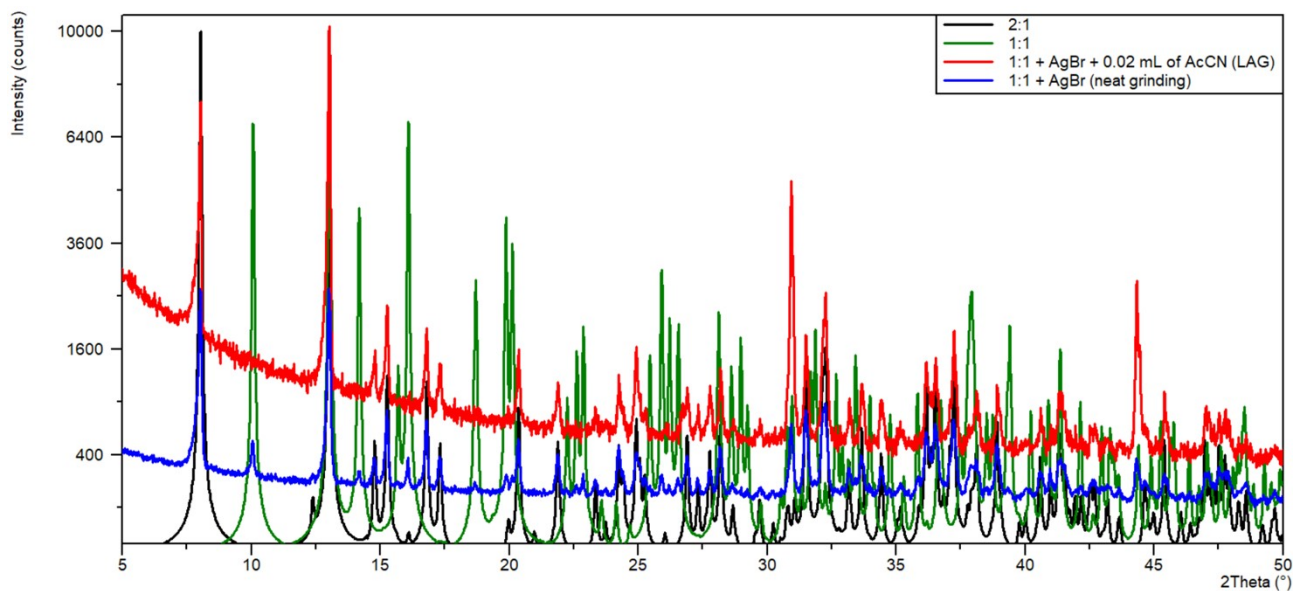

**Figure S15.** Comparison between X-ray powder diffraction patterns of  $[(\text{AgBr})_2(4\text{-pica})]_n$ , the 2:1 phase; after the neat grinding reaction with a stoichiometric quantity of AgBr (blu line) and after the LAG reaction with acetonitrile (AcCN) (red line). The peaks at  $2\theta = 30.97^\circ$  and  $44.33^\circ$  belong to AgBr. The calculated pattern of the 1:1 phase is in green, the one of the 2:1 phase is in black.

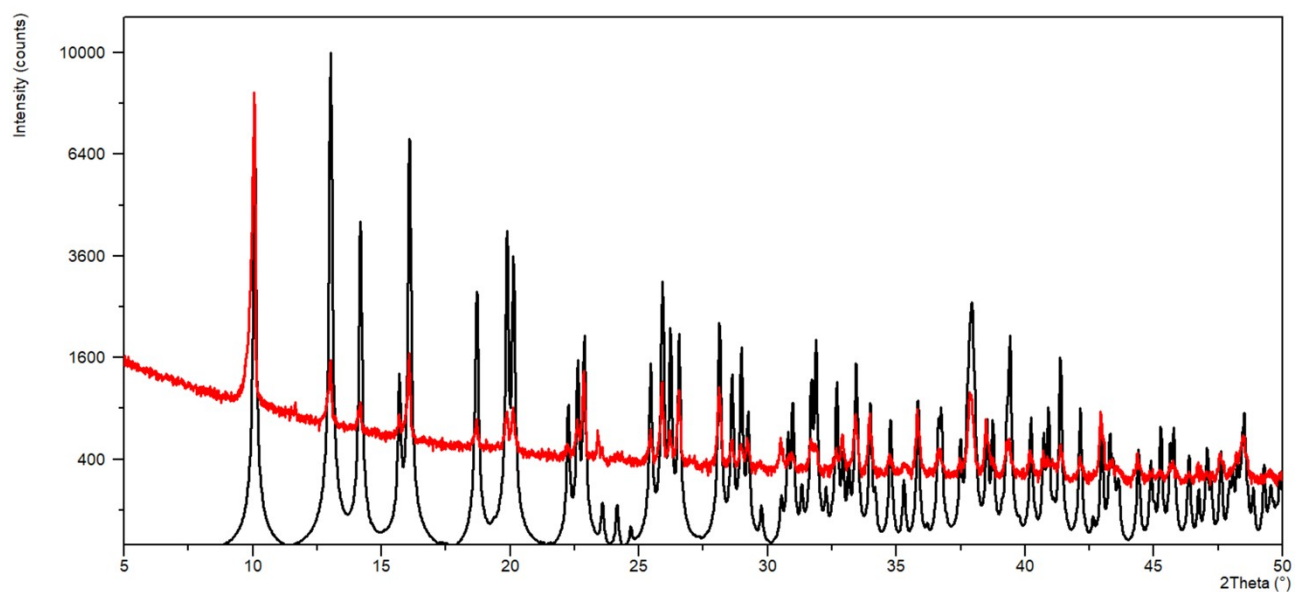

**Figure S16.** Comparison between experimental (red line) X-ray powder diffraction patterns of  $[(AgBr)_2(4-pica)]_n$ , the 2:1 phase, after the grinding reaction with 4-pica, and calculated (black) pattern of  $[(AgBr)(4-pica)]_n$ , the 1:1 phase.

## References

- 1 C. Zuffa, C. Cappuccino, M. Marchini, L. Contini, F. Farinella and L. Maini, *Faraday Discuss.*, 2023, **241**, 448–465.
- 2 A. A. Coelho, *J. Appl. Crystallogr.*, 2018, **51**, 210–218.
- 3 T. Degen, M. Sadki, E. Bron, U. König and G. Nénert, *Powder Diffr.*, 2014, **29**, S13–S18.
